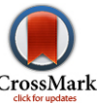

# Genetic Features of Late Onset Primary Hemophagocytic Lymphohistiocytosis in Adolescence or Adulthood

Yini Wang<sup>1</sup>, Zhao Wang<sup>1\*</sup>, Jia Zhang<sup>1</sup>, Qing Wei<sup>1</sup>, Ran Tang<sup>1</sup>, Junyuan Qi<sup>2</sup>, Lihong Li<sup>3</sup>, Liping Ye<sup>4</sup>, Jijun Wang<sup>5</sup>, Ling Ye<sup>6</sup>

**1** Department of Hematology, Beijing Friendship Hospital, Capital Medical University, Beijing, China, **2** Department of Lymphoma, Institute of Hematology and Blood Diseases Hospital Chinese Academy of Medical Sciences, Tianjin, China, **3** Department of Hematology, Beijing Chao-Yang Hospital, Capital Medical University, Beijing, China, **4** Department of Transplantation, The 309th Hospital of Chinese People's Liberation Army, Beijing, China, **5** Department of Hematology, Peking University Third Hospital, Beijing, China, **6** Department of Hematology, Shandong Jining First People's Hospital, Shandong, China

## Abstract

Hemophagocytic lymphohistiocytosis (HLH) is a life-threatening condition of uncontrolled immune activation leading to extreme inflammation. Primary HLH was once believed to be a disease that occurred only in infancy or young children, and was rarely diagnosed in adults. It is now understood that patients can develop primary HLH in their adolescence or adulthood. This study included 252 adolescent and adult patients with a clinical diagnosis of HLH from 35 general medical institutions across mainland China. All exons and 50 bp of flanking intronic sequence of six HLH-related genes (PRF1, UNC13D, STX11, STXBP2, SH2D1A, and BIRC4) were sequenced in these patients. We identified mutations in 18/252 (7.1%) of the patients, with changes in PRF1 being most common. Late-onset HLH often features viral infection and other predisposing factors. We conclude that late-onset primary HLH is not as rare as previously thought. Older patients should not be delayed to receive HLH-related genes testing when they are suspected with HLH.

**Citation:** Wang Y, Wang Z, Zhang J, Wei Q, Tang R, et al. (2014) Genetic Features of Late Onset Primary Hemophagocytic Lymphohistiocytosis in Adolescence or Adulthood. PLoS ONE 9(9): e107386. doi:10.1371/journal.pone.0107386

**Editor:** Clive M. Gray, University of Cape Town, South Africa

**Received:** February 9, 2013; **Accepted:** September 28, 2013; **Published:** September 18, 2014

**Copyright:** © 2014 Wang et al. This is an open-access article distributed under the terms of the Creative Commons Attribution License, which permits unrestricted use, distribution, and reproduction in any medium, provided the original author and source are credited.

**Funding:** This work was supported by the National Natural Science Fund, China (81270653); Medical Development Research Foundation of the Capital, China (2009-1032); and the Scientific Research Foundation of Beijing Friendship Hospital, China (YYQDKT2011-6); and Beijing Talent Cultivation Plan (D). The funders had no role in study design, data collection and analysis, decision to publish, or preparation of the manuscript.

**Competing Interests:** The authors have declared that no competing interests exist.

\* Email: zhaowww263@yahoo.com

## Introduction

Hemophagocytic lymphohistiocytosis (HLH) is an immune disorder characterized by the uncontrolled activation of T lymphocytes and macrophages and the excessive generation of inflammatory cytokines. The disease presents clinically with persistent fever, hepatosplenomegaly, pancytopenia, and hemophagocytic phenomena detected in the bone marrow, liver, spleen, and lymph tissue, with onset typically occurring in the first 2 years of life. Primary HLH (also called familial HLH) refers to cases in which there is a positive family history or a defined genetic cause. An onset of primary HLH after 8 years of age has rarely been reported [1]. A hallmark of the disease is decreased NK cell and cytotoxic T lymphocyte (CTL) function, which is thought to be caused by genetic defects in the perforin/granzyme-mediated cytotoxic pathway. Uncontrolled immune activation leading to extreme inflammation causes the onset of HLH symptoms [2]. Untreated HLH disease progresses rapidly and has a high mortality rate. The HLH-94 treatment protocol involves the use of corticosteroids, cyclosporine A, and etoposide before hematopoietic stem cell transplant (HCT) [3].

Since 1975 when Chandra [4] reported adult patients with clinical features similar to primary HLH brought on by infection, HLH in older children and even adults has generally been called secondary HLH. It is now understood that patients with a genetic basis for HLH can sometimes remain asymptomatic until adolescence or even adulthood [5–7]. Recently, Zhang et al.

reported twenty-five adult patients with HLH possessed genetic mutations in North America and Sieni et al. described eleven adult FLH in Italy [8,9]. Various mutations in at least 9 genes have been shown to play roles in primary HLH [10–19]. PRF1, UNC13D, STX11, STXBP2, RAB27A, LYST, and AP3B1 are autosomal genes, all involving perforin/granzyme-mediated cytotoxicity. SH2D1A and BIRC4 are X-linked genes, coding for an adaptor molecule called signaling lymphocyte activation molecule-associated protein (SAP) which is involved in signaling pathways that trigger cytotoxic granule release, and more recently, X-linked inhibitor of apoptosis. More importantly, all cases of HLH, regardless of genetic involvement, require prompt diagnosis and initiation of treatment.

The aims of this study were to characterize genetic changes in a large population of adolescents and adults with HLH. The Beijing Friendship Hospital, Capital Medical University accepts specimens and referral cases from all over the country and has the largest adult HLH patient database in mainland China. For this study, we sequenced all coding exons and at least 50 base pairs of the adjacent intronic sequence of the PRF1, UNC13D, STX11, STXBP2, SH2D1A and BIRC4 genes in 252 adolescent and adult HLH patients from mainland China. We also measured NK cell activity to see if it correlated with certain mutations.

## Methods

A total of 252 adolescents and adults (age  $\geq 13$  years) diagnosed clinically with HLH were ascertained between July 2006 and June 2012. The patients were diagnosed according to HLH-2004 diagnostic criteria [20] and referred to our institution from 35 general medical institutions across China (see Acknowledgments). Clinical data and peripheral blood samples were provided for each patient by their referring physician. NK cell function was determined by the lactate dehydrogenase (LDH) release assay [21,22]. Normal values for adolescents and adults in our lab range from 31.54% to 41.58% [21].

Total genomic DNA was isolated from peripheral blood samples of each patient with the MagaZorb DNA Kit (Promega, Madison, WI, USA), according to the manufacturer's instructions. All coding exons and at least 50 base pairs of the adjacent intronic sequence of the six genes associated with HLH (PRF1, UNC13D, STX11, STXBP2, SH2D1A, and BIRC4) were PCR amplified and sequenced. The patient sequences were compared to those published in Genbank (PRF1, NM\_005041.4; STX11, NM\_003764.3; SH2D1A, NM\_002351.3; UNC13D, NM\_199242.2; BIRC4, NM\_001167.2; STXBP2, NM\_006949.2).

The ethics committee of Beijing Friendship Hospital approved this study. Written informed consent was given by the patients and their caretakers or guardians for their clinical and genetic information to be stored in the hospital database and used for research.

## Results

This study group included 252 adolescent and adult patients diagnosed with HLH (147 males, age range 13–81 years). Patients were grouped by age of onset. There were 57 adolescent patients aged 13 to 17 years, and 195 adult patients aged 18 years and older. The entire coding regions and flanking intronic sequence of six genes (PRF1, UNC13D, STX11, STXBP2, SH2D1A, and BIRC4) were PCR amplified and sequenced for each patient. We identified a gene sequence change in 18 of the 252 patients (7.1%). These 18 patients (13 males and 5 females, 13–56 years) included 8 adolescents and 10 adults, accounting for 14.0% and 5.1%, respectively, of patients the same age group. Twelve of these patients had viral infections, including EBV, CMV, and HHV-7. No patients in this study had a family history of HLH disease.

Table 1 lists the clinical and DNA findings for the 18 patients with identified genetic changes. PRF1 mutations were the most common. We found 12 different PRF1 gene changes among nine patients in whom a gene change was identified, including a nonsense mutation (p.Q166X), a frameshift mutation (p.P222RfsX29), and 10 missense mutations, all at different sites. Five of the nine PRF1 mutation carriers were compound heterozygous for the PRF1 mutations. Two missense mutations in the STX11 gene (p.R49Q and p.R49W) were identified in seven patients. A single missense mutation in SH2D1A (p.A3S) was identified in two patients, and one patient had a UNC13D missense mutation. No changes in STXBP2 or BIRC4 were found in any of the 252 HLH patients in this study.

Both patients with the SH2D1A p.A3S mutation are noteworthy. One male patient (P04) also had a PRF1 mutation. Because SH2D1A p.A3S is X-linked, this mutation was inherited from his mother, and the PRF1 mutation was inherited from his father. The SH2D1A mutation is X-linked recessive, and the PRF1 mutation is autosomal recessive, thus the SH2D1A change is thought to play a dominant role in the pathogenesis in this particular patient. The other patient with the SH2D1A p.A3S

mutation (P12) was a female. Analysis of her parents showed that she inherited her abnormal X from her asymptomatic father.

Of the 18 patients in whom a mutation was identified, 11 had monoallelic mutation identified. In all patients, the NK cell activity was lower than normal levels. The NK cell activity was slightly lower in patients with biallelic mutation ( $11.59 \pm 5.07\%$ ) than in patients with monoallelic mutation ( $17.72 \pm 8.21\%$ ), although the difference was not statistically significant ( $P = 0.097$ ). Soluble CD25 (sCD25) levels, a marker of inflammation and disease status, were similar between patients with biallelic mutation ( $6101 \pm 3461$  IU/ml) and those with monoallelic mutation ( $6777 \pm 3166$  IU/ml), ( $P = 0.68$ ).

Seventeen of the 18 patients presented in this study received HLH-94 drug treatment. The patient who refused treatment died soon after diagnosis. Twelve patients achieved clinical remission after the first treatment, while five patients died without remission. Two of 12 remission patient relapsed, one died and the other achieved re-remission. Four of them underwent allogeneic HCT after first remission and survived disease free. At the termination date of the follow up, seven patients died, and eleven patients survived, with a total survival rate of 61%. In the biallelic mutation group, two patients died and five survived. In the monoallelic mutation group, five patients died and six survived. There was no significant difference in the survival rate between the two groups ( $P = 0.53$ ). Figure 1 shows the survival function of the two groups.

## Discussion

Primary HLH was first proposed by Farquhar in 1952, who described high fever, pancytopenia, hepatosplenomegaly, and rapid death in 2-month-old twins [23]. In subsequent reports, almost all patients were infants and young children, and more than half of the patients were twins, suggesting a genetic basis for the disease. Until a perforin gene mutation was found in a case of familial HLH [10], the diagnosis of primary HLH required onset in infancy and a positive family history as the support basis. After several additional genes and mutations were found to be associated with HLH, the Histiocyte Society developed the diagnostic guidelines HLH-2004. Evidence of a genetic defect is one option for diagnosing primary HLH; however, patients with refractory/reactivated HLH should also be considered as patients with severe disease. Adult HLH patients are typically diagnosed with secondary HLH because the disease seems to be induced by a concomitant condition, such as EBV infection, malignancy, or rheumatologic disorders [24]. However, many of the genetic changes found in the pediatric primary HLH cases are also reported in adults [8]. Here, we report genetic findings from a study of 252 adolescent and adult onset HLH patients from mainland China.

Mutations in PRF1 occur in 15% to 50% of patients with primary HLH [25]. Similarly, we found a PRF1 mutation in 9 of 18 (50%) patients in whom a mutation was identified. PRF1 is located at 10q21–22 and has 3 exons, with all coding sequences in exons 2 and 3. It has been clearly documented that PRF1 mutations cause decreased or absent perforin protein expression on the surface of cytotoxic cells. This condition prohibits cytotoxic and NK cells from destroying their target cells, which in turn leads to increased cytokine production and macrophage activation, causing the symptoms of HLH [26].

Cases of primary HLH with PRF1 mutations have been reported worldwide. At least 70 different mutations have been described between the two coding exons of PRF1, with p.W374X being the most common. Geographical and racial distributions of various PRF1 mutations have been reported [27]. It is possible

**Table 1.** Clinical and genetic findings for 18 HLH patients with identified mutations in HLH-related genes.

| Group                                    | Patient | Age | Sex | Gene sequencing results                        | NK cell activity (%) | sCD25 (IU/mL) | Treatment response | Outcome           | Last follow-up time(Month) |
|------------------------------------------|---------|-----|-----|------------------------------------------------|----------------------|---------------|--------------------|-------------------|----------------------------|
| <b>Biallelic or hemizygous mutations</b> | P01     | 13  | F   | PRF1: c.503G>A(p.S168N) c.1177T>C(p.C393R)     | 19.05                | 5812          | Remission/HSCT     | Survival          | 36                         |
|                                          | P03     | 13  | M   | PRF1: c.673C>T(p.R225W) c.1304C>T(p.T435M)     | 10.58                | 4547          | No remission/HSCT  | Death             | 8                          |
|                                          | P04     | 27  | M   | PRF1: c.127C>A(p.L43M) SH2D1A: c.7G>T(p.A35)   | 9.82                 | 3270          | Remission/HSCT     | Survival          | 12                         |
|                                          | P06     | 15  | M   | PRF1: c.65delC(p.P22RfsX29) c.1349C>T(p.T450M) | 9.14                 | 3822          | Remission/HSCT     | Survival          | 18                         |
|                                          | P09     | 46  | M   | PRF1: c.10C>T(p.R4C) c.98G>A(p.R33H)           | 6.95                 | 11419         | Remission          | Survival          | 8                          |
|                                          | P12     | 18  | F   | SH2D1A: c.7G>T(p.A35)                          | 18.46                | 3276          | No remission       | Death             | 12                         |
|                                          | P14     | 54  | F   | PRF1: c.65delC(p.P22RfsX29) c.674G>A(p.R225Q)  | 7.14                 | 10562         | Remission          | Survival          | 8                          |
|                                          | P02     | 48  | M   | PRF1: c.916G>A(p.G306S)                        | 20.13                | 12277         | No treatment       | Death             | 5                          |
|                                          | P05     | 56  | M   | STX11: c.146G>A(p.R49Q)                        | 27.15                | 7422          | No remission       | Death             | 8                          |
|                                          | P07     | 53  | M   | PRF1: c.65delC(p.P22RfsX29)                    | 14.26                | 8615          | Remission          | Relapse/Remission | 42                         |
| <b>Monoallelic mutations</b>             | P08     | 14  | F   | STX11: c.146G>A(p.R49Q)                        | 23.50                | 4131          | No remission       | Death             | 6                          |
|                                          | P10     | 22  | M   | PRF1: c.496C>T(p.Q166X)                        | 26.75                | 4824          | Remission          | Relapse/Death     | 14                         |
|                                          | P11     | 42  | M   | STX11: c.146G>A(p.R49Q)                        | 16.12                | 9328          | No remission       | Death             | 7                          |
|                                          | P13     | 14  | M   | STX11: c.146G>A(p.R49Q)                        | 10.73                | 4604          | Remission          | Survival          | 12                         |
|                                          | P15     | 16  | M   | UNC13D: c.1120C>A(p.P374T)                     | 9.82                 | 8964          | Remission/HSCT     | Survival          | 23                         |
|                                          | P16     | 16  | F   | STX11: c.145C>T(p.R49W)                        | 1.76                 | 5631          | Remission          | Survival          | 18                         |
|                                          | P17     | 15  | M   | STX11: c.146G>A(p.R49Q)                        | 26.91                | 733           | Remission          | Survival          | 21                         |
|                                          | P18     | 36  | M   | STX11: c.146G>A(p.R49Q)                        | 17.77                | 8019          | Remission          | Survival          | 32                         |

Normal NK cell activity range: 31.54–41.58%.

Normal sCD25 value: &lt;2400 IU/mL.

doi:10.1371/journal.pone.0107386.t001

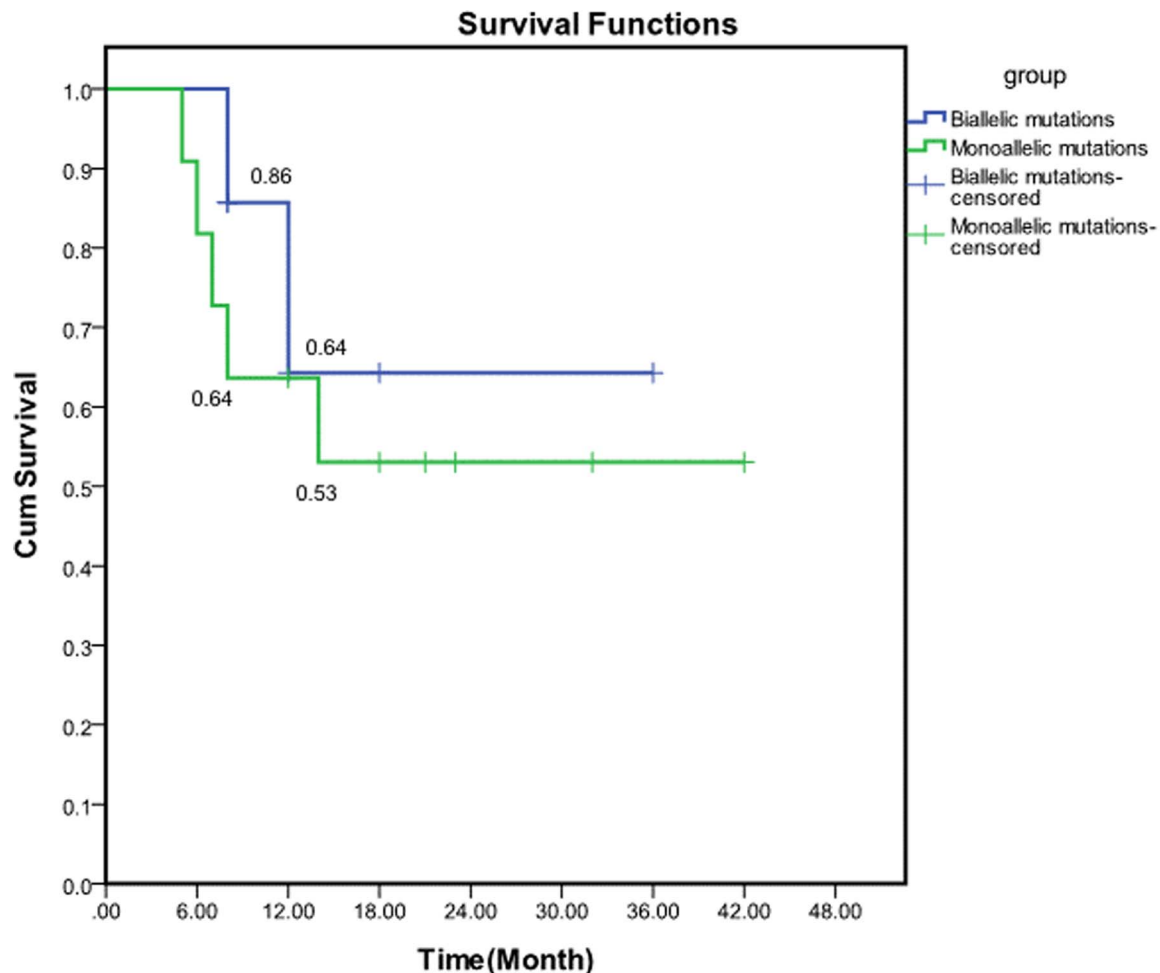

**Figure 1. Comparison of the survival rate in the two groups.**  
doi:10.1371/journal.pone.0107386.g001

that the different PRF1 mutations influence clinical severity. The mutation p.A91V, for example, occurs in a functionally unimportant region of the protein and, therefore, may lead to mild symptoms or delayed onset of HLH. Mutations causing slight reductions in perforin expression and NK cell function could be the basis of HLH that is dormant until triggered by external factors such as infection [6].

We identified two patients in our study with X-linked SH2D1A gene sequence abnormalities, one of them was a heterozygous female carrier (P12, Table 1) who experienced onset of HLH clinical symptoms at age 18, associated with T-cell lymphoma. Analysis of her parents revealed that the abnormal X chromosome came from her asymptomatic father. Generally, this mutation is predicted by in-silico analysis (SIFT, Poliphen) to be tolerated. We think that the onset of HLH disease in the carrier female may be due to nonrandom X-inactivation or differences in methylation that allow expression of the abnormal SH2D1A gene. Viral infection, particularly EBV infection, is an important predisposing factor in HLH. Studies have shown that individuals with immune deficiencies such as X-linked lymphoproliferative syndrome (XLP) are usually asymptomatic before EBV infection, and there is no clear genotype/phenotype correlation [28]. The onset and severity of HLH disease may differ among individuals due to varying exposure to triggering factors. In the absence of such triggers, the disease gene carrier may have no clinical manifestations, which

may explain the phenomenon we observed in the female X-linked SH2D1A mutation carrier and her father. In the other hand, the HLH in these two patients may also be secondary to EBV infection or lymphoma.

In this study, we observed 12 different PRF1 mutations in nine patients, most of whom had viral infection at HLH onset. Their diagnosis of secondary HLH was revised to primary HLH after genetic testing. The 7 patients with STX11 mutations also had viral infection that seemed to trigger HLH disease onset. Suppression of life-threatening inflammation must be initiated promptly in cases of both primary and secondary HLH. However, the long-term treatment strategies should focus on the underlying cause of HLH for patients in these two categories. For secondary HLH patients, control of the triggering disease or infection is critical for preventing recurrence. For primary HLH patients, who have a genetic mutation causing an immune deficiency, restoration of the lacking immune system components is vital. Therefore we believe that a clear diagnosis of primary or secondary HLH is important for long term therapy. HLH-related genetic testing can aid in distinguishing HLH types and subsequent treatment. And the functional studies, such as degranulation assays, are of great importance and should be implemented by all laboratories serving as prospective referral [29].

In this study of 252 adolescent and adult HLH patients, the overwhelming majority had no identifiable mutation in the six

HLH-related genes sequenced. We identified monoallelic mutation in 11 patients, and biallelic mutation in seven additional patients. Therefore, more than half of patients with identifiable genetic changes carried only one mutation in one of these genes. It is possible that other types of mutations were not detectable by the methodology used in this study, or that these patients possessed mutations in additional genes that have not yet been discovered to be associated with HLH. NK cell activity was lower than normal in each patient, and there was no statistically significant difference between monoallelic mutation group and biallelic mutation group. Our results support that defective cytotoxicity might be involved also in a proportion of HLH without biallelic mutations in the FHL related genes. Our data and other similar findings strongly suggest that “milder” mutations in these genes play an important role in the development of late-onset HLH when patients are challenged by viral infection or other environmental stresses.

Nowadays, HLH remains a rapidly progressive and life-threatening disease. Adoption of the HLH-94 treatment protocol increased the 3-year survival rate of HLH patients from less than 10% to about 50% [3]. In our study, the initial remission rate was 67%, and the total survival rate was 61%. The clinical results presented here are similar to others. But there was no significant difference in the survival rate between monoallelic mutation group and biallelic mutation group in our study ( $P = 0.536$ ). However, this conclusion needs to be checked up with large scale clinical study.

With the recognition of HLH in adolescent and adult patients, late-onset primary HLH occurs more commonly than was suspected previously. Furthermore, patients with recurrence of HLH, in the absence of autoimmune disease or malignancy, are

most likely to be suffering from primary HLH. Older patients should receive HLH-related genetic testing when HLH is suspected, since a proper diagnosis can aid in long term care and prevention of recurrence.

## Acknowledgments

The authors thank the following institutions for referring HLH patients and sending clinical information: Beijing Friendship Hospital, Institute of Hematology and Blood Diseases Hospital Chinese Academy of Medical Sciences, Peking University First Hospital, Peking University People's Hospital, Peking University Third Hospital, Beijing Cancer Hospital, Beijing Chao-Yang Hospital, Fu Xing Hospital Capital Medical University, Beijing Tongren Hospital, Beijing Anzhen Hospital, Beijing Jishuitan Hospital, Beijing Chest Hospital, Beijing You-an Hospital, China-Japan Friendship Hospital, Beijing Hospital, Peking Union Medical College Hospital, Beijing Shijitan Hospital, Chinese PLA General Hospital, 307 Hospital of PLA, The 309<sup>th</sup> Hospital of Chinese People's Liberation Army, 302 Military Hospital of China, Navy General Hospital, Air Force General Hospital, The Second Artillery General Hospital, The People's Liberation Army 304 Hospital, Peking University Shougang Hospital, Beijing Electric Power Hospital, Qilu Hospital of Shandong University, Henan Cancer Hospital, Shanghai Changzheng Hospital, The First Affiliated Hospital of Zhengzhou University, General Hospital of Tianjin Medical University, The First Affiliated Hospital of Guangxi University, The First Affiliated Hospital of Kunming Medical University, and Shandong Jining First People's Hospital.

## Author Contributions

Conceived and designed the experiments: ZW. Performed the experiments: JZ QW RT. Analyzed the data: YW. Contributed reagents/materials/analysis tools: JQ LL Liping Ye JW Ling Ye. Wrote the paper: YW.

## References

- Janka GE (2007) Familial and acquired hemophagocytic lymphohistiocytosis. *Eur J Pediatr* 166(2): 95–109.
- Lykens JE, Terrell CE, Zoller EE, Risma K, Jordan MB (2011) Perforin is a critical physiologic regulator of T-cell activation. *Blood* 118(3): 618–626.
- Henter JI, Samuelsson-Horne A, Arico M, Egeler RM, Elinder G, et al. (2002) Treatment of hemophagocytic lymphohistiocytosis with HLH-94 immunotherapy and bone marrow transplantation. *Blood* 100(7): 2367–2373.
- Chandra P, Chaudhery SA, Rosener F, Kagen M (1975) Transient histiocytosis with striking phagocytosis of platelets, leukocytes and erythrocytes. *Arch Intern Med* 135(7): 989–991.
- Clementi R, Emmi L, Maccario R, Liotta F, Moretta L, et al. (2002) Adult onset and atypical presentation of hemophagocytic lymphohistiocytosis in siblings carrying PRF1 mutations. *Blood* 100(6): 2266–2267.
- Mancebo E, Allende LM, Guzman M, Paz-Artal E, Gil J, et al. (2006) Familial hemophagocytic lymphohistiocytosis in an adult patient homozygous for A91V in the perforin gene, with tuberculosis infection. *Haematologica* 91(9): 1257–1260.
- Nagafuji K, Nonami A, Kumano T, Kikushige Y, Yoshimoto G, et al. (2007) Perforin gene mutations in adult-onset hemophagocytic lymphohistiocytosis. *Haematologica* 92(7): 978–981.
- Zhang K, Jordan MB, Marsh RA, Johnson JA, Kissell D, et al. (2011) Hypomorphic mutations in PRF1, MUNC13-4, and STXBP2 are associated with adult-onset familial HLH. *Blood* 118(22): 5794–5798.
- Sieni E, Cetica V, Piccin A, Gherlinzoni F, Sasso FC, et al. (2012) Familial hemophagocytic lymphohistiocytosis may present during adulthood: Clinical and genetic features of a small series. *PLoS One* 7(9): e44649.
- Stepp SE, Dufourcq-Lagelouse R, Le Deist F, Bhawan S, Certain S, et al. (1999) Perforin gene defects in familial hemophagocytic lymphohistiocytosis. *Science* 286(5446): 1957–1959.
- Feldmann J, Callebaut I, Raposo G, Certain S, Bacq D, et al. (2003) Munc13-4 is essential for cytolytic granules fusion and is mutated in a form of familial hemophagocytic lymphohistiocytosis (FHL3). *Cell* 115(4): 461–473.
- Zur Stadt U, Schmidt S, Kasper B, Beutel K, Diler AS, et al. (2005) Linkage of familial hemophagocytic lymphohistiocytosis (FHL) type-4 to chromosome 6q24 and identification of mutations in syntaxin 11. *Hum Mol Genet* 14(6): 827–834.
- Zur Stadt U, Rohr J, Seifert W, Koch F, Grieve S, et al. (2009) Familial hemophagocytic lymphohistiocytosis type 5 (FHL-5) is caused by mutations in Munc18-2 and impaired binding to syntaxin 11. *Am J Hum Genet* 85(4): 482–492.
- Arico M, Imashuku S, Clementi R, Hibi S, Teramura T, et al. (2001) Hemophagocytic lymphohistiocytosis due to germline mutations in SH2D1A, the X-linked lymphoproliferative disease gene. *Blood* 97(4): 1131–1133.
- Rigaud S, Fondaneche MC, Lambert N, Pasquier B, Mateo V, et al. (2006) XIAP deficiency in humans causes an X-linked lymphoproliferative syndrome. *Nature* 444(7115): 110–114.
- Bizario JC, Feldman J, Castro FA, Menasche G, Jacob CM, et al. (2004) Griscelli syndrome: characterization of a new mutation and rescue of T-cytotoxic activity by retroviral transfer of RAB27A gene. *J Clin Immunol* 24(4): 397–410.
- Westbroek W, Adams D, Huizing M, Koshoffer A, Dorward H, et al. (2007) Cellular defects in Chediak-Higashi syndrome correlate with the molecular genotype and clinical phenotype. *J Invest Dermatol* 127(11): 2674–2677.
- Enders A, Zieger B, Schwarz K, Yoshimi A, Speckmann C, et al. (2006) Lethal hemophagocytic lymphohistiocytosis in Hermansky-Pudlak syndrome type II. *Blood* 108(1): 81–87.
- Cetica V, Pende D, Griffiths GM, Arico M (2010) Molecular basis of familial hemophagocytic lymphohistiocytosis. *Haematologica* 95(4): 538–541.
- Henter JI, Horne AC, Arico M, Egeler RM, Filipovich AH, et al. (2007) HLH-2004: Diagnostic and Therapeutic Guidelines for Hemophagocytic Lymphohistiocytosis. *Pediatr Blood Cancer* 48(2): 124–131.
- Wang Z, Wang YN, Feng CC, Tian LP, Chen X (2008) Diagnostic significance of NK cell activity and soluble CD25 level in serum from patients with secondary hemophagocytic lymphohistiocytosis. *Zhongguo Shi Yan Xue Ye Xue Za Zhi* 16(5): 1154–1157.
- Konjević G, Jurisic V, Banićević B, Spuzić I (1999) The difference in NK-cell activity between patients with non-Hodgkin's lymphomas and Hodgkin's disease. *Br J Haematol* 104(1): 144–151.
- Farquhar JW, Claireaux AE (1952) Familial haemophagocytic reticulosis. *Arch Dis Child* 27(136): 519–525.
- Jordan MB, Allen CE, Weitzman S, Filipovich AH, McClain KL (2011) How I treat hemophagocytic lymphohistiocytosis. *Blood* 118(15): 4041–4052.
- Zur Stadt U, Beutel K, Kolberg S, Schneppenheimer R, Kabisch H, et al. (2006) Mutation spectrum in children with primary hemophagocytic lymphohistiocytosis: molecular and functional analyses of PRF1, UNC13D, STX11, and RAB27A. *Hum Mutat* 27(1): 62–68.
- Aricò M, Danesino C, Pende D, Moretta L (2001) Pathogenesis of haemophagocytic lymphohistiocytosis. *Br J Haematol* 114(4): 761–769.
- Trizzino A, zur Stadt U, Ueda I, Risma K, Janka G, et al. (2008) Genotype-phenotype study of familial haemophagocytic lymphohistiocytosis due to perforin mutations. *J Med Genet* 45(1): 15–21.

28. Woon ST, Ameratunga R, Croxson M, Taylor G, Neas K, et al. (2008) Follicular Lymphoma in a X-linked Lymphoproliferative Syndrome Carrier Female. *Scand J Immunol* 68(2): 153–158.
29. Bryceson YT, Pende D, Maul-Pavicic A, Gilmour KC, Utheil H, et al. (2012) A prospective evaluation of degranulation assays in the rapid diagnosis of familial hemophagocytic syndromes. *Blood* 119(12): 2754–2763.
